# Supplementary material
Source: PubMed Central journal article supplement (PMC8009613)
Supplement: NIHMS1640304-supplement-1.pdf [file NIHMS1640304-supplement-1.pdf]

## Supplemental Figure 1. Treatment History Summary

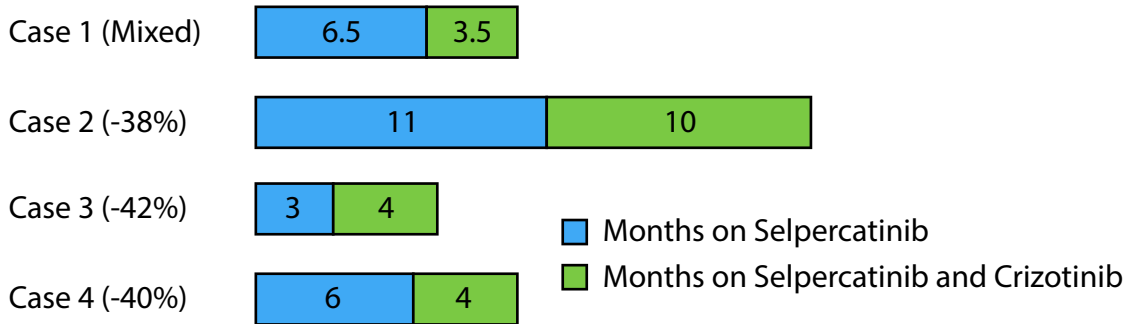

Case Number (% Best Recist Response to Selpercatinib and Crizotinib)
