# Supplementary material
Source: PubMed Central journal article supplement (PMC8009613)

# Pharmacokinetic Curves For Cases 1 and 2

## A

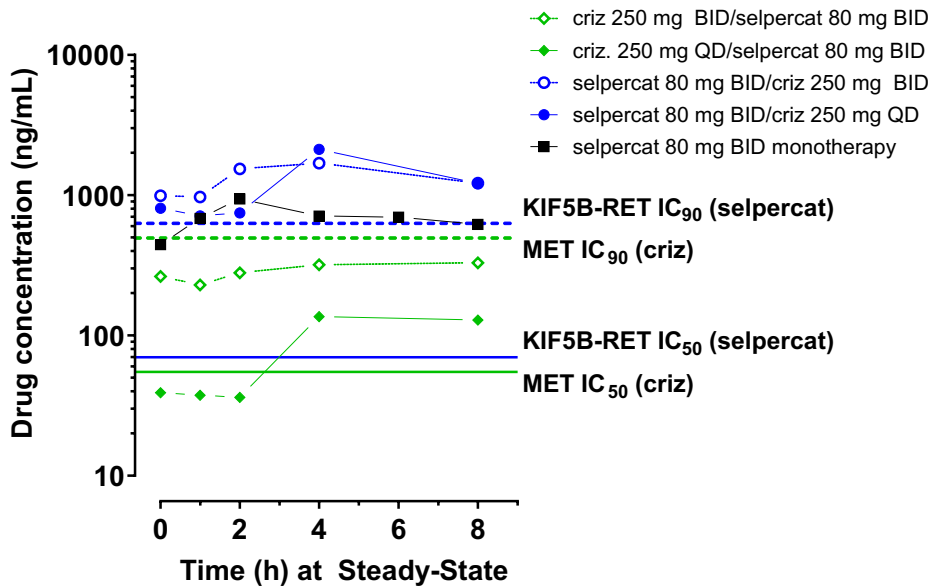

## B

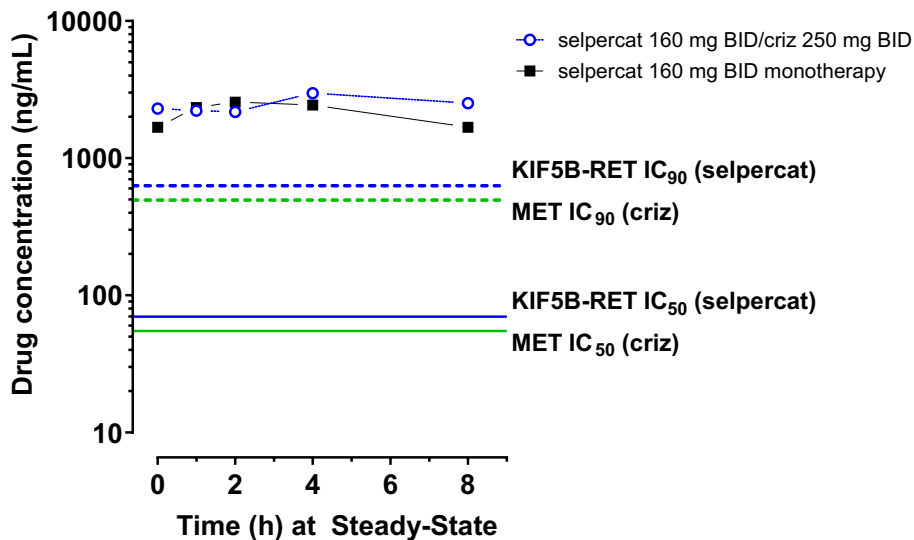

Supplement: NIHMS1640304-supplement-2.pdf [file NIHMS1640304-supplement-2.pdf]
